# Supplementary material
Source: PubMed Central journal article supplement (PMC10414012)
Supplement: sj-pdf-1-jcb-10.1177_0271678X231175190.pdf [file sj-pdf-1-jcb-10.1177_0271678X231175190.pdf]

## Supplement figures

### Supplementary Figure 1

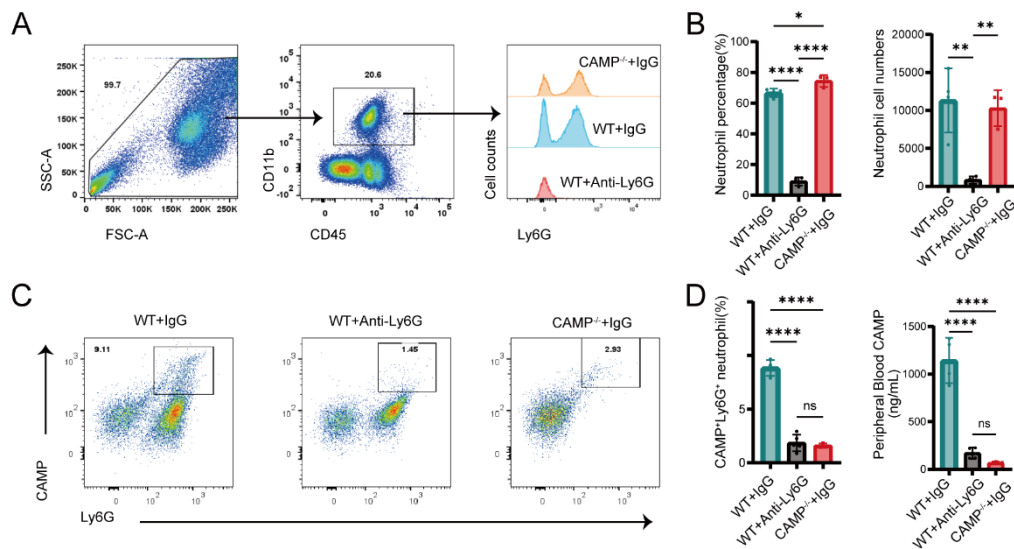

#### S1. Neutrophil depletion efficiency by using anti-Ly6G antibody. Related to figure2.

(A) Flow cytometry gating strategy and representative histogram of Ly6G<sup>+</sup> neutrophils of peripheral blood from neutrophil depletion, IgG control and CAMP<sup>-/-</sup> mice.

(B) Quantification of neutrophils cell percentage and numbers in peripheral blood (n = 3-5 per group, one-way ANOVA with Bonferroni multiple comparisons test).

(C) Representative flow cytometry plots of CAMP<sup>+</sup> Ly6G<sup>+</sup> neutrophils in peripheral blood from neutrophil depletion, IgG control and CAMP<sup>-/-</sup> groups 7 days after MCAO.

(D) Quantification of CAMP<sup>+</sup> Ly6G<sup>+</sup> neutrophils cell numbers and percentage (n = 3-5 per group, one-way ANOVA with Bonferroni multiple comparisons test).

### Supplementary Figure 2

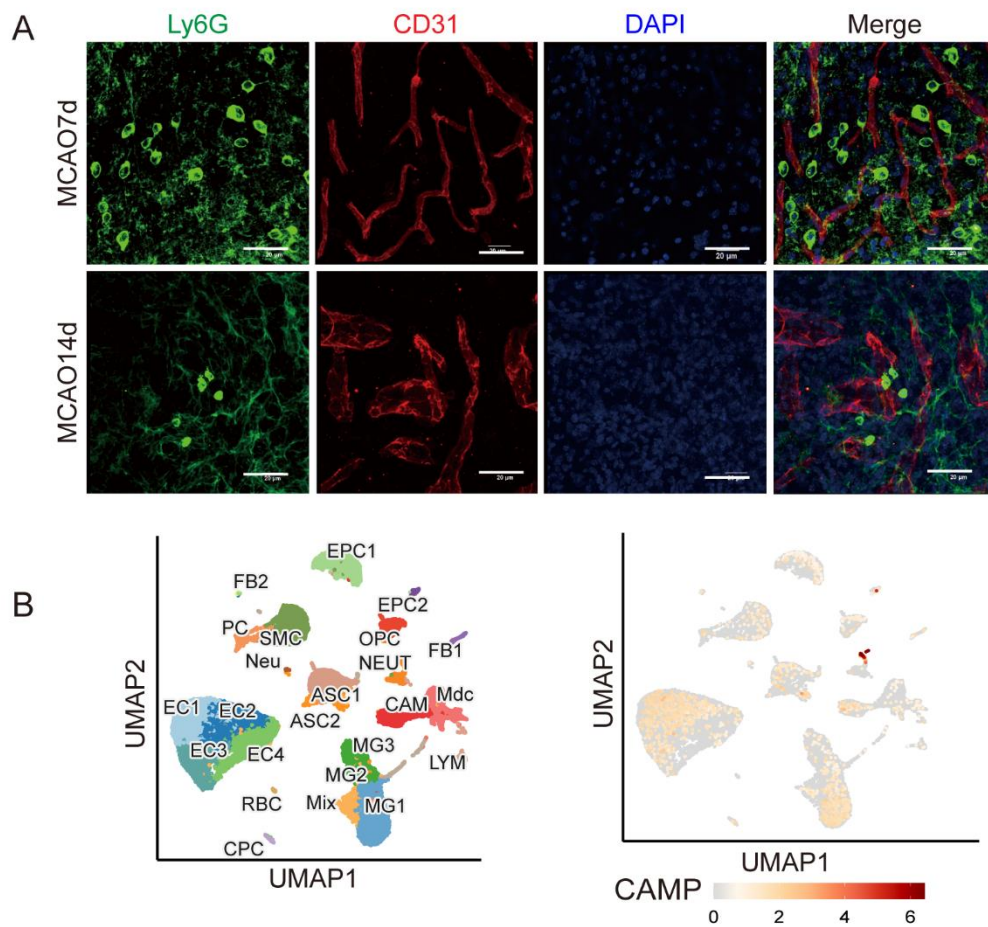

**S2. CAMP is mainly derived from neutrophils. Related to figure2**

(A) Representative images of neutrophils infiltrating into the brain parenchyma 7 days and 14 days after MCAO, scale bar: 50 $\mu$ m.

(B) UMAP plot display clusters of single cells colored by cell types and the expression distribution of CAMP 1 day after MCAO. ( GSE174574) Single cell RNA sequencing dataset (GSE174574) collected the same left cerebral hemispheres from three sham mice and three mice with MCAO1d.

**Supplementary Figure 3**

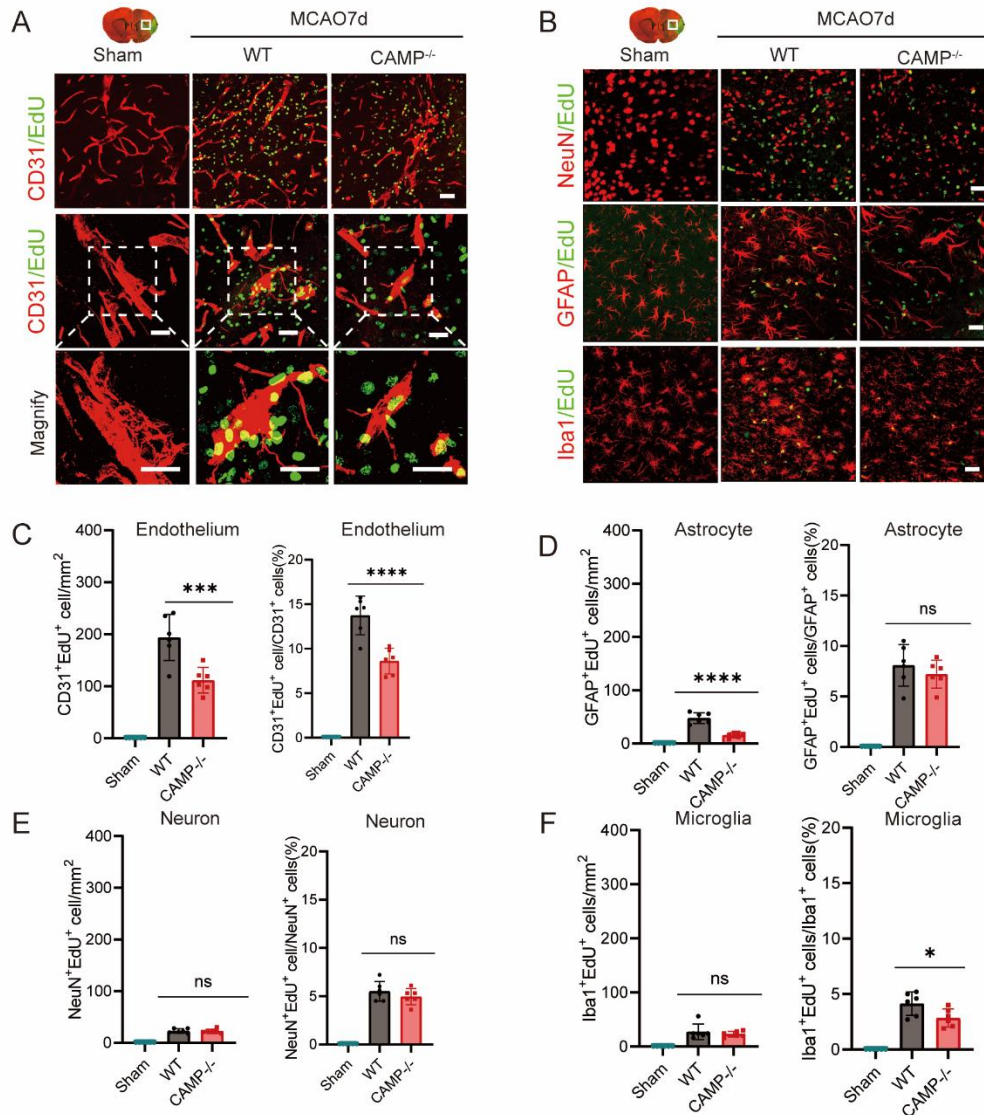

**S3. Proliferation of different cell types in neurovascular unit after MCAO. Related to figure3.**

(A) Representative confocal images of double-label immunofluorescence for EdU and CD31<sup>+</sup> cerebral endothelial cells in the penumbra regions of WT or CAMP<sup>-/-</sup> mice 7 days after MCAO or sham operation. Scale bar, 50µm.

(B) Representative confocal images of double-label immunofluorescence for EdU and NeuN<sup>+</sup> neurons, GFAP<sup>+</sup> astrocytes, or Iba1<sup>+</sup> microglia in the penumbra regions of WT or CAMP<sup>-/-</sup> mice 7 days after MCAO or sham operation. Scale bar, 50µm.

(C-F) Quantification of EdU<sup>+</sup> cell numbers and percentage in CD31<sup>+</sup> cerebral endothelial cells, NeuN<sup>+</sup> neurons, GFAP<sup>+</sup> astrocytes, and Iba1<sup>+</sup> microglia in the

penumbra regions 7 days after MCAO or sham operation (n = 6 per group, one-way ANOVA with Bonferroni multiple comparisons test).

All data are presented as means  $\pm$  SD, \*P < 0.05, \*\*P < 0.01, \*\*\*P < 0.001, \*\*\*\*P < 0.0001, ns, no significance.

#### Supplementary Figure4

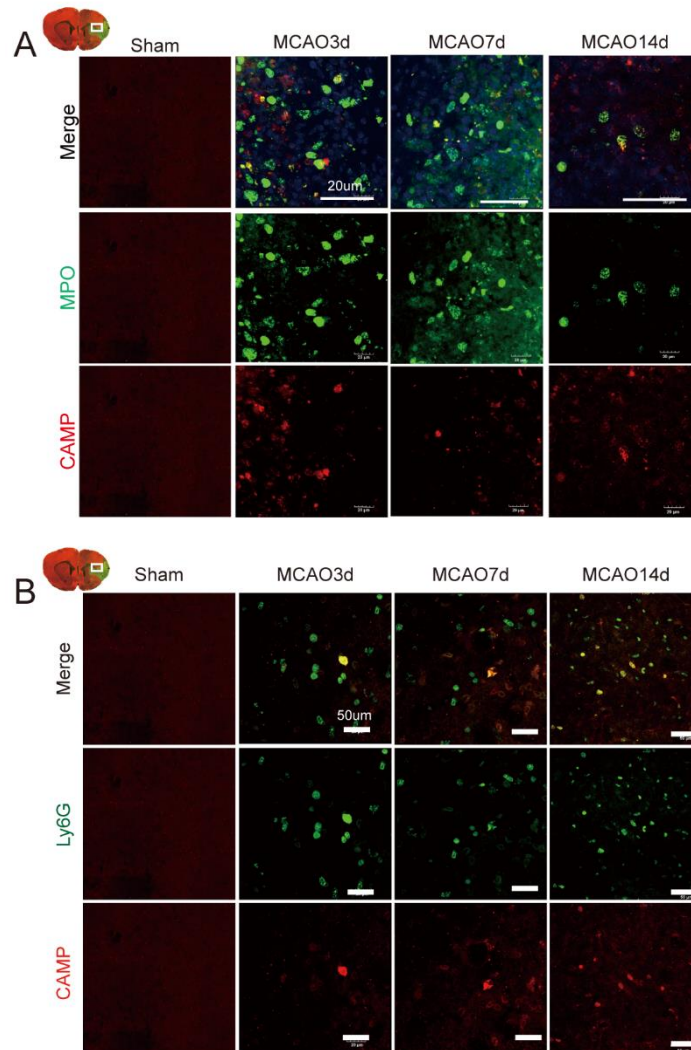

#### S4. Ly6G<sup>+</sup>CAMP<sup>+</sup> neutrophils infiltrate into the peri-infarct area after MCAO.

Related to figure 1.

(A) Representative images of MPO<sup>+</sup>CAMP<sup>+</sup> neutrophils infiltrating into the peri-infarct area at 3, 7 and 14 days after MCAO, scale bar: 20 μm.

(B) Representative images of Ly6G<sup>+</sup>CAMP<sup>+</sup> neutrophils infiltrating into the peri-infarct

area at 3, 7 and 14 days after MCAO, scale bar: 50 $\mu$ m.

**Table S1: The baseline characteristics of the recruited patients. Related to figure1.**

| Number | Age | Gender | Time after stroke<br>( day ) | NIHSS<br>(admission) |
|--------|-----|--------|------------------------------|----------------------|
| 1      | 64  | M      | 1                            | 7                    |
| 2      | 64  | M      | 3                            | 0                    |
| 3      | 68  | M      | 3                            | 2                    |
| 4      | 75  | M      | 3                            | 2                    |
| 5      | 70  | M      | 3                            | 3                    |
| 6      | 69  | M      | 1                            | 5                    |
| 7      | 68  | M      | 1                            | 5                    |
| 8      | 63  | M      | 2                            | 7                    |
| 9      | 64  | M      | 3                            | 2                    |
| 10     | 68  | M      | 1                            | 1                    |
| 11     | 71  | M      | 1                            | 1                    |
| 12     | 62  | F      | 2                            | 0                    |
| 13     | 64  | F      | 1                            | 6                    |
| 14     | 55  | F      | 3                            | 2                    |
| 15     | 61  | F      | 2                            | 7                    |
| 16     | 70  | F      | 2                            | 8                    |
| 17     | 65  | F      | 3                            | 2                    |
| 18     | 73  | F      | 1                            | 7                    |

M: Male; F: Female

**Table S2: The baseline characteristics of the recruited healthy control. Related to figure1.**

| Number | Age | Gender |
|--------|-----|--------|
| 1      | 71  | M      |
| 2      | 73  | M      |
| 3      | 75  | M      |
| 4      | 75  | M      |
| 5      | 61  | M      |
| 6      | 54  | M      |
| 7      | 73  | M      |
| 8      | 66  | M      |
| 9      | 74  | M      |
| 10     | 77  | M      |
| 11     | 59  | F      |
| 12     | 55  | F      |
| 13     | 61  | F      |
| 14     | 53  | F      |
| 15     | 58  | F      |
| 16     | 65  | F      |
| 17     | 65  | F      |
| 18     | 70  | F      |
| 19     | 58  | F      |
| 20     | 51  | F      |

M: Male; F: Female
